# Supplementary material for: Uranyl stabilized Schiff base complex
Source: Royal Society of Chemistry journal article supplement (doi:10.1039/b712322a), 2007-01-01
Supplement: b712322a.pdf [file b712322a.pdf]

Supporting Information for  
**Uranyl Stabilized Schiff base Complex**

Mohan S. Bharara, Stephen Token and Anne E. V. Gorden\*

Department of Chemistry and Biochemistry, University of Auburn, AL, USA 36849

Email: gordeae@auburn.edu

**Experimental Section**

**General Procedure:**  $\text{UO}_2(\text{NO}_3)_2 \cdot 6\text{H}_2\text{O}$ , 1,3-diamino, 2-propanol, Salicylaldehyde, triethylamine and ethylenediamine were purchased from Acros and used as received. The ligand, SalproH<sub>3</sub> was synthesized according to the literature method.<sup>1</sup> The <sup>1</sup>H/<sup>13</sup>C NMR were recorded on a Bruker AV 400 spectrometer operated at 400 MHz with d<sub>6</sub>-DMSO as solvents with tetramethylsilane as the reference. The IR data were recorded as KBr pellets on SHIMSDZU Inc. IR, Prestige-21 Fourier Transform Infrared Spectrophotometer in the range 400 – 4000 cm<sup>-1</sup>. Electrospray ionization mass spectrometry was performed on a Micromass QTOF mass spectrometer.

**X-ray Crystallography:** Crystals of compounds **1(S)<sub>2</sub>** and **2(S)** were obtained in good yield from DMF and pyridine by slow evaporation at room temperature. Crystals of Salen (N, N-ethylenebis(salicylideneimine)) were obtained by slow evaporation of d<sub>4</sub>-MeOH solution. X-ray diffraction data were collected at -80 °C on a Bruker SMART APEX CCD X-ray diffractometer unit using Mo K $\alpha$  radiation from crystals mounted in Paratone-N oil on glass fibers. SMART (v 5.624) was used for preliminary determination of cell constants and data collection control. Determination of integrated intensities and global cell refinement were performed with the Bruker SAINT Software package using a narrow-frame integration algorithm. The program suite SHELXTL (v 5.1) was used for space group determination, structure solution, and refinement.<sup>2</sup> Refinement was performed against  $F^2$  by weighted full-matrix least square, and empirical absorption correction (SADABS<sup>3</sup>) was applied. H atoms were placed at calculated positions using suitable riding models with isotropic displacement parameters derived from their carrier atoms. Crystal data, selected bond distances and angles, are provided in Tables S1 – S3.

**Synthesis of [(UO<sub>2</sub>)<sub>2</sub>(Salpro)(OH)(MeOH)<sub>2</sub>] (1'(MeOH)<sub>2</sub>):** Uranyl nitrate (2 mmol, 1.0 g) was added to a stirring solution of MeOH/CHCl<sub>3</sub> (50 mL) (1:1) containing SalproH<sub>3</sub> (2 mmol, 0.6 g) and triethylamine (2 mmol, 0.2 g) and heated to reflux temperature for 6 - 7 hours. The resulting orange precipitate was filtered, washed with cold MeOH/CHCl<sub>3</sub> (1:1) mixture and dried under vacuum (0.9 g, 98 %). X-ray quality orange crystals were obtained from supersaturated DMF or DMSO solutions.  $\delta_{\text{H}}$  (400 MHz, d<sub>6</sub>-DMSO, ppm): 2.7 and 2.9 (s, 2DMSO, 12H), 4.7, 4.9 and 5.8 (m, CH<sub>2</sub>-CH-CH<sub>2</sub>, 5H), 6.7 – 7.9 (m, 2C<sub>6</sub>H<sub>4</sub>, 8H), 9.4 (s, CHN, 2H), 11.7 (s, OH, 1H).  $\delta_{\text{C}}$  (400 MHz, d<sub>6</sub>-DMSO, ppm): 31 and 36 (CH<sub>2</sub>N), 71 (CHO), 115-163 (phenyl), 167 and 170 (CHN). IR (KBr,  $\nu_{\text{max}}$ /cm<sup>-1</sup>): 2919,

1629, 1541, 1469, 1447, 1383, 1309, 1202, 1151, 1030, 895, 801. m/z (EI): 980 ( $M^+ + 2\text{MeOH}$ ) (10 %).

**Synthesis of  $[\text{UO}_2(\text{Salen})(\text{S})] \cdot (2 \cdot (\text{S}))$  ( $\text{S} = \text{MeOH}, \text{Py}$ )<sup>4</sup>:** Uranyl nitrate (1 mmol, 0.5 g) was added to a stirring solution of MeOH/ $\text{CHCl}_3$  (50 mL) (1:1) containing SalproH<sub>3</sub> (1 mmol, 0.3 g) and ethylenediamine (2 mmol, 0.12g) and heated to reflux temperature for 2 - 3 hours. The resulting orange precipitate was filtered, washed with cold MeOH/ $\text{CHCl}_3$  (1:1) mixture and dried under vacuum (0.37 g, 66 %). X-ray quality crystals were obtained from slow evaporation of pyridine at room temperature.  $\delta_{\text{H}}$  (400 MHz,  $d_6$ -DMSO, ppm): 2.7 (s, DMSO, 3H), 4.5 (t,  $\text{CH}_2$ , 2H), 6.7, 6.9 and 7.6 (m,  $\text{C}_6\text{H}_4$ , 4H), 9.5 (s, CHN, 1H).  $\delta_{\text{C}}$  (400 MHz,  $d_6$ -DMSO, ppm): 42.8 (DMSO), 64 ( $\text{CH}_2$ ), 116 – 135 (phenyl) and 169 (CHN). IR (KBr,  $\nu_{\text{max}}/\text{cm}^{-1}$ ): 2956, 1626, 1436, 1385, 1256, 1014, 896, 799. m/z (EI): 1072 ( $2M^+ - 2\text{MeOH}$ ) (2%); 536 ( $M^+ - \text{MeOH}$ ) (65 %).

**Reaction of  $1 \cdot (\text{S})_2$  with excess of EDA:** Ethylenediamine (3 mmol, 0.18 g) was added to the methanolic suspension of  $1 \cdot (\text{MeOH})_2$  (1 mmol, 0.1 g) and the resulting reaction mixture was refluxed for 6 – 7 hours. The solvent was completely removed and the precipitate was washed with cold MeOH/ $\text{CHCl}_3$  (1:1) mixture and dried under vacuum. The precipitate was dissolved in either DMF or DMSO, which yielded orange crystals of  $1 \cdot (\text{DMF/DMSO})_2$ .

**Reaction of SalproH<sub>3</sub> with EDA:** EDA (0.1 mmol) was added to a suspension of SalproH<sub>3</sub> (0.1 mmol) in MeOH (5 mL) and shaken until the latter dissolved completely. The solution was slowly evaporated which yielded orange crystals of Salen.

Table S1. Crystal Data for Compounds **1** and **2**.

| Compounds                          | <b>1</b>                                                   | <b>2</b>                                                 |
|------------------------------------|------------------------------------------------------------|----------------------------------------------------------|
| Empirical formula                  | $\text{C}_{11.5}\text{H}_{15}\text{N}_2\text{O}_5\text{U}$ | $\text{C}_{21}\text{H}_{19}\text{N}_3\text{O}_4\text{U}$ |
| Fw                                 | 499.29                                                     | 615.42                                                   |
| Wavelength (Å)                     | 0.71073                                                    | 0.71073                                                  |
| Crys syst                          | Monoclinic                                                 | Orthorhombic                                             |
| Space group                        | P1 21/n 1                                                  | P c a 21                                                 |
| a (Å)                              | 11.797(3)                                                  | 18.427(2)                                                |
| b (Å)                              | 9.784(2)                                                   | 9.0712(1)                                                |
| c (Å)                              | 24.594(5)                                                  | 11.8143(1)                                               |
| $\alpha$ (deg)                     | 90.00                                                      | 90.00                                                    |
| $\beta$ (deg)                      | 94.811(4)                                                  | 90.00                                                    |
| $\gamma$ (deg)                     | 90.00                                                      | 90.00                                                    |
| V (Å <sup>3</sup> )                | 2828.7(2)                                                  | 1974.8(4)                                                |
| Z                                  | 8                                                          | 4                                                        |
| density calcd (mg/m <sup>3</sup> ) | 2.345                                                      | 2.070                                                    |
| abs coeff (mm <sup>-1</sup> )      | 11.495                                                     | 8.252                                                    |
| F(000)                             | 1840                                                       | 1160                                                     |
| Cryst size (mm <sup>3</sup> )      | 0.1x0.1x0.05                                               | 0.1x0.1x0.1                                              |

|                                                 |                                                      |                                                      |
|-------------------------------------------------|------------------------------------------------------|------------------------------------------------------|
| Reflns collected                                | 18601                                                | 10662                                                |
| Indep reflns                                    | 4058 ( $R_{\text{int}} = 0.0687$ )                   | 2838 ( $R_{\text{int}} = 0.0569$ )                   |
| Refinements method                              | Full-matrix least squares on $F^2$                   | Full-matrix least squares on $F^2$                   |
| GOF of $F^2$                                    | 0.858                                                | 0.968                                                |
| Final R indices [ $I > 2\sigma(I)$ ]            | $R_1 = 0.0272$                                       | $R_1 = 0.0254$                                       |
| R indices (all data)                            | $wR_2 = 0.0539$<br>$R_1 = 0.0364$<br>$wR_2 = 0.0557$ | $wR_2 = 0.0574$<br>$R_1 = 0.0286$<br>$wR_2 = 0.0588$ |
| Largest diff peak and hole ( $e/\text{\AA}^3$ ) | 1.177 and -0.691                                     | 1.146 and -0.606                                     |

Table S2. Selected bond distances ( $\text{\AA}$ ) and angles ( $^\circ$ ) for compound **1**(DMF)<sub>2</sub>.

|          |           |          |           |
|----------|-----------|----------|-----------|
| U1-O2    | 1.783(4)  | U1-O1    | 1.792(4)  |
| U1-O6    | 2.241(5)  | U1-O8    | 2.327(4)  |
| U1-O7    | 2.380(5)  | U1-N1    | 2.544(5)  |
| U2-O3    | 1.778(4)  | U2-O4    | 1.794(4)  |
| U2-O5    | 2.235(5)  | U2-O8    | 2.343(4)  |
| U2-O7    | 2.364(4)  | U2-N2    | 2.579(5)  |
| U2-O1D1  | 2.400(5)  | U1-O1D2  | 2.461(4)  |
| U1-U2    | 3.869(8)  |          |           |
|          |           |          |           |
| O2-U1-O1 | 178.7(2)  | O2-U1-O6 | 88.0(2)   |
| O1-U1-O6 | 90.76(2)  | O2-U1-O8 | 91.90(2)  |
| O1-U1-O8 | 89.29(2)  | O6-U1-O8 | 154.81(2) |
| O2-U1-O7 | 88.5(2)   | O1-U1-O7 | 92.34(2)  |
| O6-U1-O7 | 136.31(2) | O8-U1-O7 | 68.84(2)  |
|          |           |          |           |
| O3-U2-O4 | 179.5(2)  | O3-U2-O5 | 92.0(2)   |
| O4-U2-O5 | 87.80(2)  | O3-U2-O8 | 89.20(2)  |
| O4-U2-O8 | 90.83(2)  | O5-U2-O8 | 155.83(2) |
| O3-U2-O7 | 91.60(2)  | O4-U2-O7 | 88.85(2)  |
| O5-U2-O7 | 135.22(2) | O8-U2-O7 | 68.83(2)  |

Table S3. Selected bond distances ( $\text{\AA}$ ) and angles ( $^\circ$ ) for compound **2**(Py).

|          |          |          |           |
|----------|----------|----------|-----------|
| U1-O1    | 1.783(4) | U1-O2    | 1.777(4)  |
| U1-O3    | 2.242(4) | U1-O4    | 2.230(3)  |
| C1-O3    | 1.314(6) | C12-O4   | 1.323(6)  |
|          |          |          |           |
| O2-U1-O1 | 177.3(2) | O2-U1-O4 | 89.86(2)  |
| O1-U1-O4 | 91.40(2) | O2-U1-O3 | 88.97(2)  |
| O1-U1-O3 | 91.02(2) | O4-U1-O3 | 152.42(2) |

|          |           |          |           |
|----------|-----------|----------|-----------|
| O2-U1-N2 | 88.49(2)  | O1-U1-N2 | 89.66(2)  |
| O4-U1-N2 | 71.01(2)  | O3-U1-N2 | 136.48(2) |
| O2-U1-N1 | 92.46(2)  | O1-U1-N1 | 84.98(2)  |
| O4-U1-N1 | 136.72(2) | O3-U1-N1 | 70.86(2)  |
| N2-U1-N1 | 65.87(2)  | O2-U1-N3 | 95.62(2)  |
| O1-U1-N3 | 87.01(2)  | O4-U1-N3 | 75.93(2)  |
| O3-U1-N3 | 76.77(2)  | N2-U1-N3 | 146.67(2) |
| N1-U1-N3 | 146.44(2) |          |           |

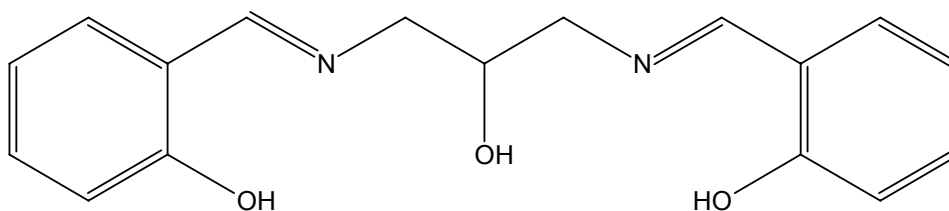

SalproH<sub>3</sub>

Fig S1. Chemical structure of SalproH<sub>3</sub>.

Reference:

1. Nishida, Y.; Kida, S., *Dalton Trans.* **1986**, 2633.
2. Sheldrick, G. M., *SHELXTL PC, version 6.12, An Integrated System for Solving, Refining, and Displaying Crystal Structures from Diffraction Data; Siemens Analytical X-ray Instruments, Inc. Madison, WI, 2001.*
3. Sheldrick, G. M., *SADABS-An empirical absorption correction program; Bruker Analytical X-ray Systems Madison, WI, 1996.*
4. This compound has been reported and characterized earlier with EtOH/DMF/DMSO as coordinating solvents.
